# Supplementary material for: Global Health Education in Ugandan Medical Schools: Student and Faculty Insights on Integrating a Decolonization-Focused Curriculum
Source: Research Square preprint supplement (doi:10.21203/rs.3.rs-7171150/v1), 2025-09-04
Supplement: Supplementary file 1 [file f0684ad22f4567fac7cd6e4e.docx]

**Part A: Questionnaire**

***Circle out your choice or choices***

**SOCIAL-DEMOGRAPHICS**

1. How old are you
   1. 18-24
   2. 25-30
   3. 30-35
   4. 35-40
   5. Above 40
2. What is your gender
   1. Male
   2. Female
3. What is your marital status?
   1. Single
   2. Married
   3. Divorced
   4. Widowed
4. What is the name of your medical school
   1. Makerere university college of health sciences
   2. Busitema university school of medicine
   3. Gulu university school of medicine
   4. Kabale university school of medicine
   5. Soroti university school of medicine
   6. Mbarara university school of medicine
   7. Habib medical school
   8. St. Augustine international university
   9. Kampala international university medical school
   10. Uganda Christian University medical school

1. What is your current year of study
   1. Year 1
   2. Year 2
   3. Year 3
   4. Year 4
   5. Year 5
   6. Year 6
2. What is your religion
   1. Anglican
   2. Catholic
   3. Muslim
   4. Born again
   5. Other
3. On a scale of 1 to 10, rate your social-political involvement. 1,2,3,4,5,6,7,8,9,10

**The current state of global health education**

1. Do you have subject areas on global health education at your medical school?
   - 1. Yes
     2. No
     3. Not sure
2. If yes, which of the following subject areas on global health education is taught at your medical school? (Select all that apply)
   1. Global Burden of Disease
   2. Travel Medicine
   3. Social Determinants of Health
   4. Cultural sensitivity
   5. Immigrant health
   6. Health systems
   7. Biostatistics and epidemiology
   8. Health inequity
   9. Human rights and ethics
   10. Environmental determinants of health
3. Do you have any programs on global health education at your medical school
   1. Yes
   2. No
   3. Not sure
4. If yes, which of the following programs are present at your medical school
   1. International students exchange programs
   2. Leadership training programs
   3. Global health research and education
   4. Field placements or internships in low-resource settings
5. Are there any organizations supporting global health education at your school?
   1. Yes
   2. No
   3. Not sure

1. How do you learn about colonization and decolonization of global health?
   1. Enrolling in Academic course
   2. Read Books and Articles on global health
   3. Attending Conferences and Workshops
   4. Online Resources and webinars
   5. Collaborate and networks

1. Which resources are available to you for global health education at your medical school?
   - 1. Textbooks
     2. Online Courses
     3. Journals and Research papers
     4. Webinars and Podcasts
     5. Online forums and communities
2. Do you have any prior knowledge about global health education and its decolonizing perspectives?
   - 1. Yes
     2. No
     3. Not sure
3. Do you have any faculty members in the field of global health or experts in the field of global health at your school who can contribute to global health education at your school?
   - 1. Yes
     2. No
     3. Not sure
4. What are some of the ways that you have learned about colonization and decolonization outside of your formal education?
   - 1. Textbooks
     2. Online Courses
     3. Journals and Research Papers
     4. Webinars and Podcasts
     5. Online forums and communities

**Perceptions and attitudes**

*Using the table below, select your level of agreement.*

1. Do you know about global health education?
   - 1. Yes
     2. No
     3. Not sure

|  | **Strongly**  **Agree** | **Agree** | **Not Sure** | **Disagree** | **Strongly**  **Disagree** |
| --- | --- | --- | --- | --- | --- |
| It is important to learn about the history of colonialism and its impact on global health. |  |  |  |  |  |
|  |  |  |  |  |  |
| decolonizing perspectives important in global health education? |  |  |  |  |  |
| The curriculum could be improved by including more content on colonization and decolonization. |  |  |  |  |  |
| learning about colonization and decolonization would impact your future work as a healthcare provider. |  |  |  |  |  |
| My school’s curriculum has provided a strong foundation in global health from which to continue individual and professional development. |  |  |  |  |  |

*Table 1 Attitudes and perceptions of medical students*

Would you be interested in taking a course on colonization and decolonization in global health?

- - - 1. Yes
      2. No
      3. Not sure

**Part B: Key Informant Interview Guide**

1. What are some of the challenges and opportunities for integrating decolonizing perspectives into the global health curriculum in Uganda?
2. What are the current curricular offerings in global health education in medical schools in Uganda?
3. How much attention is given to decolonizing perspectives in these courses?
4. How are global health topics framed in these courses?
5. What are the resources that are available to support the decolonization of global health education in Uganda?
6. Do you have faculty members or experts in the field of global health at your institutions? Do you think they would support the integration of a curriculum on colonization and decolonization of global health education?
7. What are the views of faculty and administrators in medical schools in Uganda towards integrating a curriculum on colonization and decolonization of global health education?
8. What are the political and social factors that could affect the implementation of a curriculum on colonization and decolonization of global health education in Uganda?
9. What are the potential benefits and risks of integrating a curriculum on colonization and decolonization of global health education in Uganda?
10. Do you think it’s feasible to integrate a curriculum on colonization and decolonization of global health education in Uganda into the curriculum of medical students in Uganda?
11. What are the potential facilitators in implementing the curriculum?
12. Should this curriculum be incorporated into the medical school program as a) compulsory course, b) elective course?
